# Supplementary material
Source: PubMed Central journal article supplement (PMC3255721)
Supplement: supp_78.2.455_AEM6251-11_TableS1.pdf [file supp_78.2.455_AEM6251-11_TableS1.pdf]

TABLE S1. *E. coli* O157:H7 genes exhibiting >2-fold difference (p<0.01) in all clinical and spinach strains compared to environmental strains

| Locus (Gene)          | RM6069<br>Clinical | RM6655<br>Clinical | RM6658<br>Clinical | RM9998<br>Spinach | RM10002<br>Spinach | RM6067<br>Spinach | RM9992<br>Spinach | RM9997<br>Spinach | Function                                       |
|-----------------------|--------------------|--------------------|--------------------|-------------------|--------------------|-------------------|-------------------|-------------------|------------------------------------------------|
| Z4930 ( <i>gadA</i> ) | -159.74            | -113.77            | -158.48            | -154.32           | -192.31            | -24.39            | 1.90              | 1.49              | glutamate decarboxylase isozyme                |
| Z4921 ( <i>hdeB</i> ) | -145.14            | -90.91             | -93.46             | -64.94            | -53.76             | -22.57            | 1.60              | 1.69              | hypothetical protein                           |
| Z4922 ( <i>hdeA</i> ) | -135.50            | -113.64            | -125.47            | -68.97            | -59.52             | -24.81            | 1.02              | 1.27              | hypothetical protein                           |
| Z3692 ( <i>yfeT</i> ) | -128.70            | -114.68            | -94.34             | -64.10            | -51.81             | -23.20            | 1.17              | 1.16              | hypothetical protein                           |
| Z4923 ( <i>hdeD</i> ) | -45.05             | -23.81             | -36.90             | -51.02            | -49.50             | -9.26             | 1.04              | -1.09             | hypothetical protein                           |
| Z4925 ( <i>yhiE</i> ) | -29.41             | -19.57             | -36.90             | -11.42            | -11.15             | -10.88            | 3.31              | 2.88              | hypothetical protein                           |
| Z4376 ( <i>ygiW</i> ) | -23.26             | -13.37             | -16.00             | -10.57            | -12.48             | -5.21             | 1.75              | 1.45              | hypothetical protein                           |
| Z3526 ( <i>elaB</i> ) | -22.68             | -18.35             | -36.76             | -25.51            | -26.74             | -4.65             | 1.11              | -1.05             | hypothetical protein                           |
| Z1034 ( <i>dps</i> )  | -21.69             | -32.57             | -16.29             | -7.94             | -7.46              | -8.06             | 2.14              | 2.03              | DNA protection during starvation conditions    |
| Z4926 ( <i>yhiU</i> ) | -19.38             | -9.80              | -13.44             | -10.22            | -11.03             | -6.13             | 1.98              | 2.24              | hypothetical protein                           |
| Z5977 ( <i>osmY</i> ) | -18.76             | -20.70             | -26.88             | -17.64            | -21.01             | -7.46             | 2.44              | 2.67              | hyperosmotically inducible periplasmic protein |
| Z4920 ( <i>yhiD</i> ) | -18.48             | -13.68             | -12.66             | -22.22            | -30.86             | -9.17             | -2.12             | -2.02             | putative transport ATPase                      |
| Z2949 ( <i>otsA</i> ) | -15.53             | -10.66             | -16.81             | -15.75            | -15.38             | -6.41             | 1.79              | 1.68              | trehalose 6-phosphate synthase                 |
| Z3260 (Z3260)         | -15.13             | -12.06             | -10.11             | -6.17             | -7.35              | -6.37             | 3.17              | 3.16              | fructose-bisphosphate aldolase                 |
| Z4454 (Z4454)         | -14.27             | -16.21             | -16.13             | -11.88            | -14.68             | -3.55             | -1.19             | -1.34             | hypothetical protein                           |
| Z5644 ( <i>yjbJ</i> ) | -13.18             | -19.34             | -17.57             | -18.02            | -14.97             | -4.72             | -1.13             | 1.00              | hypothetical protein                           |
| Z4452 ( <i>yqiD</i> ) | -12.71             | -23.31             | -16.72             | -12.06            | -14.79             | -3.57             | -1.15             | -1.14             | hypothetical protein                           |
| Z2950 ( <i>otsB</i> ) | -12.45             | -9.62              | -12.25             | -20.88            | -21.69             | -7.09             | 1.67              | 1.54              | trehalose 6-phosphatase                        |

|                       |        |        |        |        |        |       |       |       |                                                                      |
|-----------------------|--------|--------|--------|--------|--------|-------|-------|-------|----------------------------------------------------------------------|
| Z4453 ( <i>yqjE</i> ) | -12.21 | -18.94 | -15.04 | -12.25 | -14.41 | -3.23 | -1.02 | 1.06  | hypothetical protein                                                 |
| Z2761 ( <i>katE</i> ) | -12.02 | -7.81  | -12.42 | -11.63 | -14.84 | -4.72 | 2.85  | 2.80  | catalase; hydroperoxidase HPII(III)                                  |
| Z2858 (Z2858)         | -11.93 | -11.31 | -9.17  | -5.52  | -5.62  | -6.71 | 3.18  | 3.21  | hypothetical protein                                                 |
| Z4927 ( <i>yhiV</i> ) | -11.71 | -6.25  | -7.41  | -7.14  | -11.27 | -5.26 | 1.46  | 1.69  | putative transport system permease protein                           |
| Z2883 (Z2883)         | -11.42 | -15.20 | -16.05 | -12.42 | -11.66 | -2.65 | -1.04 | 1.24  | hypothetical protein                                                 |
| Z2769 ( <i>osmE</i> ) | -11.03 | -13.26 | -12.59 | -6.71  | -7.87  | -5.21 | -1.07 | -1.01 | activator of <i>ntrL</i> gene                                        |
| Z5008 ( <i>aldB</i> ) | -10.73 | -7.63  | -8.93  | -8.40  | -12.38 | -3.29 | 1.73  | 1.67  | aldehyde dehydrogenase B (lactaldehyde dehydrogenase)                |
| Z4451 ( <i>yqjC</i> ) | -10.70 | -15.80 | -8.93  | -4.29  | -3.95  | -3.36 | 2.27  | 2.53  | hypothetical protein                                                 |
| Z3972 ( <i>ygaM</i> ) | -10.01 | -12.69 | -21.46 | -21.51 | -22.57 | -5.21 | -1.65 | -1.67 | hypothetical protein                                                 |
| Z0425 ( <i>yahO</i> ) | -9.71  | -6.13  | -15.29 | -38.76 | -20.79 | -2.51 | -1.93 | -1.98 | hypothetical protein                                                 |
| Z2228 ( <i>osmC</i> ) | -9.09  | -7.30  | -6.90  | -4.35  | -5.15  | -4.67 | 1.14  | 1.32  | osmotically inducible protein                                        |
| Z2553 ( <i>yciG</i> ) | -9.01  | -4.74  | -3.13  | -14.51 | -9.01  | -3.75 | -1.18 | 1.11  | hypothetical protein                                                 |
| Z4928 ( <i>yhiW</i> ) | -8.62  | -5.03  | -6.25  | -5.05  | -5.92  | -7.19 | 1.76  | 2.42  | transcriptional regulator, AraC family                               |
| Z1686 ( <i>msyB</i> ) | -8.47  | -9.62  | -8.06  | -6.94  | -7.25  | -4.03 | 1.25  | 1.15  | acidic protein suppresses mutants lacking function of protein export |
| Z0859 ( <i>phrB</i> ) | -8.40  | -7.09  | -8.70  | -10.35 | -10.14 | -3.47 | -1.26 | -1.29 | deoxyribodipyrimidine photo-lyase type I                             |
| Z4908 ( <i>slp</i> )  | -8.33  | -4.29  | -5.26  | -4.59  | -4.35  | -5.05 | 4.71  | 5.38  | outer membrane protein induced after carbon starvation               |
| Z2217 (Z2217)         | -8.20  | -5.13  | -5.75  | -4.72  | -4.61  | -5.59 | -1.71 | -1.20 | hypothetical protein                                                 |
| Z0858 ( <i>ybgA</i> ) | -8.06  | -5.56  | -7.94  | -8.13  | -8.77  | -3.33 | 1.74  | 1.64  | hypothetical protein                                                 |
| Z4986 ( <i>yiaH</i> ) | -8.06  | -12.64 | -12.84 | -9.01  | -8.55  | -5.71 | 1.55  | 1.23  | hypothetical protein                                                 |
| Z3045 (Z3045)         | -8.00  | -8.00  | -11.68 | -14.03 | -11.48 | -2.07 | 1.50  | 1.41  | hypothetical protein                                                 |
| Z0923 (Z0923)         | -7.75  | -7.63  | -6.80  | -7.04  | -6.45  | -5.13 | 2.19  | 2.28  | putative homeobox protein                                            |

|                       |       |        |        |        |        |       |       |       |                                                              |
|-----------------------|-------|--------|--------|--------|--------|-------|-------|-------|--------------------------------------------------------------|
| Z1391 ( <i>hyaC</i> ) | -7.58 | -5.46  | -10.49 | -13.99 | -14.62 | -7.19 | -1.06 | -1.20 | probable Ni/Fe-hydrogenase 1 b-type cytochrome subunit       |
| Z2219 (Z2219)         | -7.52 | -4.12  | -6.54  | -7.25  | -9.17  | -4.76 | -1.53 | -1.48 | hypothetical protein                                         |
| Z2837 ( <i>yeaQ</i> ) | -7.30 | -10.04 | -7.52  | -7.87  | -6.25  | -1.95 | -1.07 | -1.01 | hypothetical protein                                         |
| Z0607 ( <i>ybaT</i> ) | -7.19 | -6.41  | -9.17  | -13.51 | -12.80 | -5.26 | -1.48 | -1.32 | putative amino acid/amine transport protein                  |
| Z3964 ( <i>ygaU</i> ) | -6.90 | -6.58  | -9.43  | -8.77  | -8.40  | -3.75 | -1.06 | -1.34 | hypothetical protein                                         |
| Z4426 ( <i>ygjG</i> ) | -6.85 | -3.48  | -6.21  | -5.88  | -5.10  | -4.26 | 2.96  | 2.38  | diamine aminotransferase                                     |
| Z4919 (Z4919)         | -6.62 | -2.83  | -12.11 | -6.99  | -7.58  | -3.95 | -1.68 | -1.81 | putative ATP-binding protein of ABC transport system         |
| Z1392 ( <i>hyaD</i> ) | -6.54 | -6.45  | -8.00  | -14.49 | -15.63 | -7.58 | -1.93 | -1.97 | Hydrogenase 1 maturation peptidase HyaD. Aspartic peptidase. |
| Z5709 ( <i>phnB</i> ) | -6.41 | -5.24  | -17.06 | -9.26  | -8.13  | -2.89 | 2.03  | 1.73  | hypothetical protein                                         |
| Z1243 ( <i>ycaC</i> ) | -6.37 | -5.46  | -6.10  | -10.81 | -10.00 | -2.11 | 1.90  | 1.66  | hypothetical protein                                         |
| Z1685 ( <i>yceK</i> ) | -6.21 | -9.43  | -5.75  | -10.63 | -12.20 | -4.12 | -2.00 | -2.13 | hypothetical protein                                         |
| Z3252 (Z3252)         | -6.17 | -4.50  | -8.20  | -8.62  | -7.46  | -3.24 | 1.15  | 1.08  | hypothetical protein                                         |
| Z1394 ( <i>hyaF</i> ) | -6.13 | -4.74  | -6.13  | -7.94  | -8.85  | -5.78 | -1.25 | -1.36 | nickel incorporation into hydrogenase-1 proteins             |
| Z0606 ( <i>ybaS</i> ) | -6.10 | -5.65  | -7.04  | -11.57 | -6.02  | -6.85 | 1.40  | 1.24  | L-glutaminase                                                |
| Z0992 ( <i>ybhB</i> ) | -6.10 | -5.32  | -4.81  | -3.37  | -3.26  | -4.88 | 2.30  | 2.01  | phospholipid-binding protein, PBP family                     |
| Z1091 ( <i>artM</i> ) | -6.02 | -4.02  | -5.32  | -4.29  | -4.18  | -2.40 | -1.08 | -1.08 | L-arginine ABC transporter membrane protein                  |
| Z1504 (Z1504)         | -6.02 | -4.95  | -4.17  | -4.37  | -4.59  | -1.51 | 1.89  | 1.78  | amino terminal fragment of WrbA                              |
| Z1393 ( <i>hyaE</i> ) | -5.88 | -5.13  | -5.65  | -10.17 | -9.62  | -7.87 | -1.43 | -1.17 | processing of HyaA and HyaB proteins                         |
| Z1422 ( <i>yccJ</i> ) | -5.81 | -8.77  | -4.31  | -5.43  | -5.52  | -1.99 | 2.34  | 1.99  | hypothetical protein                                         |
| Z3721 ( <i>tktB</i> ) | -5.81 | -5.13  | -4.67  | -3.04  | -4.57  | -2.58 | 1.50  | 1.52  | transketolase                                                |
| Z0400 ( <i>betI</i> ) | -5.78 | -4.65  | -4.83  | -1.90  | -2.70  | -3.85 | 1.22  | 1.39  | transcriptional regulator BetI                               |

|                       |       |        |       |        |       |       |       |       |                                                      |
|-----------------------|-------|--------|-------|--------|-------|-------|-------|-------|------------------------------------------------------|
| Z2230 ( <i>rpsV</i> ) | -5.71 | -11.15 | -3.64 | -1.72  | -1.33 | -2.58 | 3.13  | 3.10  | SSU ribosomal protein S22P                           |
| Z2232 ( <i>adhP</i> ) | -5.68 | -5.43  | -5.99 | -5.85  | -6.94 | -3.44 | 1.13  | 1.08  | alcohol dehydrogenase                                |
| Z3048 (Z3048)         | -5.65 | -6.90  | -4.31 | -3.97  | -2.22 | -3.57 | -1.60 | -1.51 | hypothetical protein                                 |
| Z4455 ( <i>yqjF</i> ) | -5.49 | -4.18  | -5.05 | -4.72  | -5.35 | -1.90 | -1.15 | -1.06 | hypothetical protein                                 |
| Z1531 (Z1531)         | -5.41 | -4.95  | -4.72 | -2.21  | -2.92 | -4.81 | 1.91  | 1.83  | hypothetical protein                                 |
| Z1389 ( <i>hyaA</i> ) | -5.32 | -3.92  | -3.42 | -5.85  | -8.40 | -4.48 | 1.20  | 1.24  | hydrogenase-1 small subunit                          |
| Z3249 (Z3249)         | -5.29 | -4.78  | -9.80 | -6.85  | -6.80 | -1.63 | 2.07  | 1.94  | hypothetical protein                                 |
| Z1951 ( <i>ycgB</i> ) | -5.21 | -3.80  | -6.33 | -6.99  | -8.26 | -1.93 | 1.74  | 2.08  | putative sporulation protein                         |
| Z0480 ( <i>psiF</i> ) | -5.08 | -3.37  | -3.50 | -4.18  | -3.82 | -2.80 | 1.27  | 1.11  | induced by phosphate starvation                      |
| Z2710 ( <i>ynhD</i> ) | -5.05 | -2.92  | -3.58 | -3.15  | -4.18 | -2.22 | 2.64  | 1.89  | Iron-regulated ABC transporter ATPase subunit SufC   |
| Z3720 ( <i>talA</i> ) | -5.05 | -4.74  | -4.29 | -2.82  | -4.29 | -3.00 | 2.39  | 2.42  | transaldolase                                        |
| Z2824 ( <i>yeaH</i> ) | -4.98 | -3.40  | -3.50 | -5.75  | -5.08 | -2.12 | 1.25  | 1.51  | hypothetical protein                                 |
| Z4456 ( <i>yqjG</i> ) | -4.90 | -3.16  | -4.78 | -3.62  | -4.12 | -2.29 | 1.48  | 1.23  | putative transferase                                 |
| Z2661 ( <i>sodC</i> ) | -4.81 | -4.67  | -4.93 | -3.94  | -4.88 | -2.74 | 2.05  | 2.08  | superoxide dismutase precursor (Cu-Zn)               |
| Z5876 ( <i>yjgB</i> ) | -4.81 | -3.76  | -5.62 | -6.94  | -7.69 | -2.34 | 1.21  | -1.09 | putative oxidoreductase                              |
| Z4890 ( <i>yhiM</i> ) | -4.78 | -3.86  | -6.21 | -7.52  | -6.85 | -4.88 | 1.76  | 1.28  | hypothetical protein                                 |
| Z3042 ( <i>dsrB</i> ) | -4.74 | -6.90  | -6.49 | -10.54 | -9.90 | -2.79 | -3.55 | -4.10 | hypothetical protein                                 |
| Z3380 ( <i>yehZ</i> ) | -4.67 | -3.17  | -5.81 | -6.94  | -5.52 | -2.17 | 2.44  | 3.10  | putative transport system permease protein           |
| Z2709 ( <i>ynhC</i> ) | -4.63 | -3.10  | -4.55 | -5.26  | -6.37 | -2.32 | 1.44  | 1.16  | Iron-regulated ABC transporter permease protein SufD |
| Z5729 ( <i>yjdJ</i> ) | -4.59 | -5.52  | -4.20 | -4.22  | -3.97 | -1.80 | 1.13  | 1.16  | hypothetical protein                                 |
| Z4695 (Z4695)         | -4.48 | -11.11 | -5.15 | -5.29  | -4.46 | -3.19 | -1.79 | -1.17 | putative iron storage homoprotein, bacterioferritin  |

|                       |       |        |       |       |       |       |       |       |                                                                        |
|-----------------------|-------|--------|-------|-------|-------|-------|-------|-------|------------------------------------------------------------------------|
| Z4365 ( <i>yqhE</i> ) | -4.44 | -3.64  | -3.39 | -3.06 | -2.75 | -2.82 | 1.82  | 1.70  | putative enzyme                                                        |
| Z5245 ( <i>asnA</i> ) | -4.39 | -12.66 | -8.55 | -8.13 | -9.62 | 1.04  | -2.09 | -1.96 | aspartate-ammonia ligase                                               |
| Z0503 ( <i>yajB</i> ) | -4.33 | -7.35  | -4.61 | -3.48 | -2.93 | -3.14 | -1.09 | -1.03 | putative glycoprotein                                                  |
| Z2708 (Z2708)         | -4.22 | -2.61  | -3.64 | -3.52 | -4.15 | -2.22 | 1.52  | 1.40  | cysteine desulfurase                                                   |
| Z3378 ( <i>yehX</i> ) | -4.08 | -2.62  | -4.48 | -4.55 | -6.02 | -2.36 | -1.64 | -1.32 | putative ATP-binding component of a transport system                   |
| Z4722 ( <i>fic</i> )  | -4.08 | -4.22  | -4.88 | -4.35 | -5.05 | -2.63 | -1.19 | -1.41 | induced in stationary phase, recognized by rpoS, affects cell division |
| Z1418 ( <i>cbpA</i> ) | -4.00 | -3.60  | -3.48 | -2.84 | -2.98 | -2.87 | 2.39  | 2.05  | curved DNA-binding protein; functions closely related to DnaJ          |
| Z0539 ( <i>bolA</i> ) | -3.98 | -5.85  | -3.66 | -2.77 | -2.27 | -2.96 | 1.13  | 1.08  | transcriptional regulator, BolA protein family                         |
| Z2707 ( <i>ynhA</i> ) | -3.98 | -3.38  | -3.98 | -4.46 | -3.85 | -1.66 | 1.24  | -1.03 | Cysteine desulfuration protein SufE                                    |
| Z3722 (Z3722)         | -3.95 | -4.22  | -3.82 | -3.61 | -3.19 | -3.38 | 1.00  | 1.35  | hypothetical protein                                                   |
| Z4958 ( <i>dppD</i> ) | -3.95 | -2.84  | -4.15 | -2.59 | -3.53 | -2.19 | -1.21 | -1.17 | putative ATP-binding component of dipeptide transport system           |
| Z1092 ( <i>artQ</i> ) | -3.92 | -3.70  | -3.79 | -3.37 | -4.42 | -2.21 | -1.23 | -1.18 | L-arginine ABC transporter membrane protein                            |
| Z4418 ( <i>rpsU</i> ) | -3.92 | -12.41 | -4.29 | -1.11 | 1.00  | -1.84 | -1.50 | -1.16 | SSU ribosomal protein S21P                                             |
| Z0475 (Z0475)         | -3.82 | -2.77  | -3.53 | -3.37 | -4.12 | -3.17 | 1.06  | 1.14  | hypothetical protein                                                   |
| Z1105 ( <i>poxB</i> ) | -3.69 | -2.93  | -3.11 | -6.71 | -6.10 | -2.13 | 2.68  | 3.13  | pyruvate dehydrogenase (cytochrome)                                    |
| Z0027 ( <i>rpsT</i> ) | -3.68 | -10.60 | -3.86 | 1.61  | 1.73  | -2.53 | 1.15  | 1.77  | SSU ribosomal protein S20P                                             |
| Z4981 ( <i>cspA</i> ) | -3.68 | -20.66 | -8.55 | 1.01  | 1.10  | -6.37 | -1.25 | -1.22 | cold-shock DNA-binding protein family                                  |
| Z1036 ( <i>ompX</i> ) | -3.66 | -11.11 | -4.18 | -1.90 | -1.67 | -4.44 | -1.48 | -1.05 | outer membrane protein X                                               |
| Z4151 (Z4151)         | -3.64 | -4.26  | -4.00 | -2.66 | -3.48 | -2.92 | -1.31 | -1.27 | hypothetical protein                                                   |
| Z4628 ( <i>yhdV</i> ) | -3.51 | -3.16  | -2.99 | -4.88 | -4.76 | -3.16 | -2.20 | -2.67 | hypothetical protein                                                   |
| Z2523 ( <i>osmB</i> ) | -3.50 | -10.58 | -4.03 | -1.59 | -2.39 | -4.48 | 1.66  | 2.42  | osmotically inducible lipoprotein                                      |

|                       |       |        |       |       |       |       |       |       |                                                                      |
|-----------------------|-------|--------|-------|-------|-------|-------|-------|-------|----------------------------------------------------------------------|
| Z0399 ( <i>betB</i> ) | -3.48 | -2.82  | -2.78 | -1.94 | -2.04 | -2.97 | 1.54  | 1.26  | betaine aldehyde dehydrogenase                                       |
| Z5728 ( <i>yjdI</i> ) | -3.48 | -3.26  | -3.33 | -3.86 | -3.12 | -1.92 | 1.14  | 1.03  | hypothetical protein                                                 |
| Z2270 ( <i>yncB</i> ) | -3.45 | -2.80  | -4.00 | -6.02 | -4.76 | -2.75 | 1.03  | -1.13 | putative oxidoreductase                                              |
| Z5601 ( <i>aceA</i> ) | -3.42 | -11.07 | -4.55 | -4.55 | -6.80 | -2.76 | 1.37  | 1.01  | isocitrate lyase                                                     |
| Z3017 ( <i>amyA</i> ) | -3.40 | -3.36  | -4.39 | -3.14 | -3.58 | -1.97 | 2.02  | 2.18  | cytoplasmic alpha-amylase                                            |
| Z2775 ( <i>spy</i> )  | -3.38 | -2.94  | -5.18 | -1.51 | -1.52 | -2.96 | 2.25  | 2.31  | periplasmic protein related to spheroblast formation                 |
| Z1397 ( <i>appA</i> ) | -3.28 | -2.23  | -2.82 | -2.88 | -3.06 | -3.62 | 1.14  | 1.18  | phosphoanhydride phosphorylase; pH 2.5 acid phosphatase; periplasmic |
| Z4935 ( <i>yhjD</i> ) | -3.27 | -2.44  | -3.30 | -4.35 | -5.13 | -2.18 | 1.03  | 1.11  | hypothetical protein                                                 |
| Z0486 ( <i>aroM</i> ) | -3.21 | -2.43  | -4.29 | -3.22 | -3.27 | -2.33 | 1.06  | -1.07 | protein of aro operon, regulated by aroR                             |
| Z1396 ( <i>appB</i> ) | -3.11 | -2.92  | -2.53 | -2.60 | -3.39 | -3.30 | -1.19 | -1.18 | probable third cytochrome oxidase, subunit II                        |
| Z1417 ( <i>yccD</i> ) | -3.11 | -3.05  | -2.35 | -4.46 | -3.98 | -2.44 | 1.04  | -1.04 | hypothetical protein                                                 |
| Z1009 ( <i>ybhP</i> ) | -3.10 | -2.69  | -3.13 | -3.61 | -4.02 | -2.38 | -1.13 | -1.01 | hypothetical protein                                                 |
| Z2704 ( <i>pykF</i> ) | -3.07 | -4.72  | -3.76 | -2.30 | -2.06 | -2.45 | 1.84  | 1.88  | pyruvate kinase (EC 2.7.1.40)                                        |
| Z1094 ( <i>artP</i> ) | -3.06 | -3.00  | -2.75 | -1.68 | -1.51 | -2.19 | 2.33  | 2.29  | L-arginine ABC transporter ATP-binding protein                       |
| Z3804 ( <i>csiE</i> ) | -3.06 | -2.51  | -2.60 | -1.77 | -1.86 | -2.09 | 2.88  | 2.66  | transcriptional antiterminator, BglG family                          |
| Z4931 ( <i>yhjA</i> ) | -3.04 | -2.99  | -4.46 | -8.93 | -8.85 | -4.07 | -1.89 | -2.02 | putative cytochrome C peroxidase                                     |
| Z0720 ( <i>ybdK</i> ) | -2.97 | -2.29  | -4.15 | -3.79 | -4.35 | -1.94 | 1.52  | 1.31  | hypothetical protein                                                 |
| Z1993 ( <i>chaC</i> ) | -2.94 | -3.11  | -4.22 | -4.08 | -4.76 | -1.18 | 1.35  | 1.20  | cation transport regulator                                           |
| Z2186 (Z2186)         | -2.93 | -2.46  | -3.23 | -4.33 | -4.02 | -3.08 | 1.23  | -1.01 | trans-aconitate 2-methyltransferase                                  |
| Z3772 ( <i>guaB</i> ) | -2.90 | -9.17  | -5.99 | -3.13 | -2.64 | -2.46 | -2.24 | -2.10 | inosine-5'-monophosphate dehydrogenase                               |
| Z4547 ( <i>rpmA</i> ) | -2.89 | -12.76 | -6.13 | -1.97 | -1.79 | -2.13 | -2.52 | -2.04 | LSU ribosomal protein L27P                                           |

|                       |       |       |       |       |       |       |       |       |                                                              |
|-----------------------|-------|-------|-------|-------|-------|-------|-------|-------|--------------------------------------------------------------|
| Z2162 ( <i>ydeI</i> ) | -2.88 | -5.49 | -3.30 | -3.77 | -3.38 | -2.69 | -1.03 | -1.01 | hypothetical protein                                         |
| Z3385 ( <i>yohD</i> ) | -2.85 | -2.44 | -3.03 | -3.69 | -3.55 | -1.90 | -1.22 | -1.56 | hypothetical protein                                         |
| Z0752 ( <i>ybdR</i> ) | -2.84 | -2.14 | -2.54 | -3.05 | -2.92 | -3.10 | 1.00  | 1.01  | putative oxidoreductase                                      |
| Z4094 ( <i>eno</i> )  | -2.84 | -5.43 | -3.04 | -1.06 | -1.28 | -1.36 | 2.08  | 2.24  | enolase (EC 4.2.1.11)                                        |
| Z2711 ( <i>ynhE</i> ) | -2.82 | -2.42 | -4.02 | -5.00 | -5.35 | -1.74 | 2.04  | 1.55  | Iron-regulated ABC transporter membrane component SufB       |
| Z2554 ( <i>yciF</i> ) | -2.80 | -2.25 | -2.67 | -3.22 | -4.03 | -2.33 | 2.56  | 2.59  | putative structural proteins                                 |
| Z3998 ( <i>csrA</i> ) | -2.80 | -6.41 | -2.43 | -1.93 | -2.20 | -1.82 | -1.42 | -1.23 | carbon storage regulator                                     |
| Z4359 ( <i>exbB</i> ) | -2.78 | -6.71 | -5.03 | -2.52 | -2.83 | -2.78 | -1.01 | -1.40 | uptake of enterochelin; tonB-dependent uptake of B colicins  |
| Z5694 (Z5694)         | -2.77 | -2.97 | -3.02 | -6.02 | -7.14 | -2.60 | -3.31 | -2.89 | hypothetical protein                                         |
| Z2899 ( <i>yebF</i> ) | -2.76 | -6.02 | -4.61 | -4.18 | -4.41 | -1.47 | -1.62 | -1.42 | hypothetical protein                                         |
| Z4961 ( <i>dppA</i> ) | -2.76 | -2.74 | -3.33 | -1.34 | -1.56 | -1.75 | 3.60  | 3.60  | dipeptide transport protein                                  |
| Z0565 ( <i>ybaY</i> ) | -2.75 | -3.04 | -3.02 | -2.49 | -2.59 | -2.44 | 1.19  | 1.09  | glycoprotein/polysaccharide metabolism                       |
| Z3771 ( <i>guaA</i> ) | -2.73 | -6.62 | -2.81 | -1.25 | -1.07 | -2.33 | 1.04  | 1.07  | GMP synthase (glutamine-hydrolyzing)                         |
| Z4126 (Z4126)         | -2.71 | -5.81 | -4.13 | -4.83 | -4.24 | -2.16 | 1.01  | 1.40  | hypothetical protein                                         |
| Z5968 ( <i>fhuF</i> ) | -2.68 | -3.27 | -3.32 | -1.41 | -1.49 | -2.97 | 1.21  | 1.18  | hypothetical protein                                         |
| Z4957 ( <i>dppF</i> ) | -2.66 | -2.90 | -3.69 | -2.48 | -2.89 | -1.81 | -1.23 | -1.31 | putative ATP-binding component of dipeptide transport system |
| Z2330 ( <i>hslJ</i> ) | -2.65 | -3.44 | -2.62 | -1.54 | -1.51 | -2.44 | 1.42  | 1.75  | heat shock protein hslJ                                      |
| Z4458 ( <i>yhaI</i> ) | -2.64 | -2.29 | -2.65 | -2.94 | -3.61 | -1.66 | -1.35 | -1.69 | putative cytochrome                                          |
| Z0093 ( <i>ftsL</i> ) | -2.61 | -3.77 | -2.56 | -1.67 | -1.27 | -1.28 | 1.24  | 1.26  | cell division protein; ingrowth of wall at septum            |
| Z4661 ( <i>mscL</i> ) | -2.60 | -3.77 | -2.53 | -1.82 | -1.20 | -1.23 | 1.56  | 1.53  | large-conductance mechanosensitive channel                   |
| Z4607 ( <i>mreD</i> ) | -2.60 | -3.98 | -3.38 | -2.87 | -3.22 | -1.90 | -2.44 | -1.80 | rod shape-determining protein                                |

|                       |       |        |       |        |       |       |       |       |                                                                             |
|-----------------------|-------|--------|-------|--------|-------|-------|-------|-------|-----------------------------------------------------------------------------|
| Z2885 ( <i>pphA</i> ) | -2.59 | -2.61  | -2.95 | -3.46  | -3.06 | -1.43 | -1.47 | -1.71 | protein phosphatase 1 modulates phosphoproteins, signals protein misfolding |
| Z4995 ( <i>bax</i> )  | -2.59 | -3.64  | -2.28 | 1.00   | -1.02 | -1.31 | 1.91  | 2.79  | putative ATP-binding protein                                                |
| Z0401 ( <i>betT</i> ) | -2.58 | -2.93  | -4.22 | -2.56  | -3.22 | -3.40 | -1.78 | -1.78 | high-affinity choline transport                                             |
| Z4057 ( <i>ygbE</i> ) | -2.54 | -3.66  | -2.76 | -2.70  | -3.15 | -2.23 | -1.80 | -1.49 | putative cytochrome oxidase subunit                                         |
| Z3796 (Z3796)         | -2.53 | -6.06  | -2.53 | 1.37   | 1.30  | -2.04 | 1.25  | 1.59  | hypothetical protein                                                        |
| Z3798 (Z3798)         | -2.51 | -6.06  | -2.82 | 1.27   | 1.28  | -2.49 | 1.41  | 1.14  | transcriptional regulator, BadM/Rrf2 family                                 |
| Z3795 ( <i>iscA</i> ) | -2.47 | -6.06  | -2.69 | -1.14  | -1.18 | -1.84 | -1.09 | -1.04 | iron-sulfur cluster assembly protein                                        |
| Z0588 ( <i>ybaB</i> ) | -2.46 | -6.67  | -3.00 | -1.48  | -1.11 | -1.74 | -1.19 | 1.07  | hypothetical protein                                                        |
| Z0780 ( <i>mrdB</i> ) | -2.46 | -2.82  | -2.92 | -1.73  | -1.96 | -1.89 | -1.66 | -1.63 | cell elongation-specific peptidoglycan biosynthesis regulator RodA          |
| Z4549 ( <i>rplU</i> ) | -2.45 | -11.29 | -3.65 | -1.04  | -1.16 | -1.81 | -1.81 | -1.04 | LSU ribosomal protein L21P                                                  |
| Z1395 ( <i>appC</i> ) | -2.44 | -2.46  | -2.19 | -1.70  | -3.17 | -2.80 | 1.20  | 1.47  | probable third cytochrome oxidase, subunit I                                |
| Z0195 ( <i>rnhB</i> ) | -2.43 | -3.66  | -3.14 | -2.15  | -2.04 | -1.44 | -2.00 | -1.64 | RNase HII                                                                   |
| Z0589 ( <i>recR</i> ) | -2.43 | -4.35  | -2.59 | -1.90  | -1.76 | -1.40 | -1.35 | -1.26 | DNA replication and repair protein RecR                                     |
| Z0783 ( <i>ybeB</i> ) | -2.42 | -4.65  | -3.45 | -1.19  | -1.33 | -1.50 | 1.11  | 1.38  | hypothetical protein                                                        |
| Z2739 ( <i>btuE</i> ) | -2.40 | -3.14  | -2.60 | -2.32  | -2.10 | -2.07 | 1.12  | 1.20  | vitamin B12 transport                                                       |
| Z1923 (Z1923)         | -2.39 | -4.93  | -6.33 | -18.73 | -8.70 | -2.30 | 1.34  | 1.05  | unknown protein encoded by prophage CP-933X                                 |
| Z5013 ( <i>yibF</i> ) | -2.39 | -2.54  | -2.68 | -2.16  | -2.53 | -2.02 | -1.09 | -1.11 | putative S-transferase                                                      |
| Z0790 ( <i>ybeL</i> ) | -2.39 | -3.77  | -2.40 | -3.47  | -2.80 | -2.39 | -1.70 | -1.48 | putative alpha helical protein                                              |
| Z5453 ( <i>sodA</i> ) | -2.38 | -4.76  | -4.12 | -2.54  | -2.58 | -3.18 | -1.02 | -1.14 | superoxide dismutase, manganese                                             |
| Z5756 ( <i>blc</i> )  | -2.34 | -2.87  | -2.23 | -4.78  | -6.06 | -1.96 | -1.26 | -1.37 | outer membrane lipoprotein (lipocalin)                                      |
| Z1740 ( <i>ptsG</i> ) | -2.34 | -2.30  | -2.22 | -1.64  | -1.98 | -1.37 | 1.67  | 1.95  | PTS system D-glucose-specific IIC component / IIB component                 |



|                       |       |       |       |       |       |       |       |       |                                                                                                        |
|-----------------------|-------|-------|-------|-------|-------|-------|-------|-------|--------------------------------------------------------------------------------------------------------|
| Z2268 (Z2268)         | -2.33 | -2.86 | -2.73 | -1.62 | -1.82 | -2.39 | 1.06  | 1.21  | putative outer membrane receptor for iron transport                                                    |
| Z3682 ( <i>ptsI</i> ) | -2.30 | -5.43 | -2.05 | -1.16 | -1.08 | -2.03 | 1.35  | 1.85  | phosphoenolpyruvate--protein phosphotransferase                                                        |
| Z0777 ( <i>dacA</i> ) | -2.30 | -3.70 | -2.28 | 1.26  | 1.17  | -2.13 | 1.93  | 2.51  | penicillin-binding protein 6. Serine peptidase.                                                        |
| Z0787 ( <i>holA</i> ) | -2.29 | -2.80 | -2.27 | 1.04  | -1.08 | -1.54 | -1.29 | -1.03 | DNA polymerase III, delta subunit                                                                      |
| Z3797 ( <i>yfhO</i> ) | -2.28 | -6.49 | -2.72 | 1.34  | 1.41  | -2.10 | 1.58  | 1.65  | cysteine desulfurase IscS                                                                              |
| Z3657 (Z3657)         | -2.27 | -3.34 | -3.29 | -2.58 | -2.61 | -3.00 | -1.30 | -1.07 | hypothetical protein                                                                                   |
| Z5478 ( <i>hslU</i> ) | -2.23 | -6.13 | -3.68 | -1.79 | -1.35 | -1.43 | 1.24  | 1.56  | ATP-dependent protease ATP-binding subunit                                                             |
| Z5464 ( <i>tpiA</i> ) | -2.23 | -4.17 | -2.92 | -1.33 | -1.36 | -1.88 | 1.70  | 1.73  | triosephosphate isomerase                                                                              |
| Z2244 ( <i>narZ</i> ) | -2.22 | -2.04 | -2.98 | -5.49 | -3.56 | -2.99 | -1.56 | -1.52 | respiratory nitrate reductase alpha subunit apoprotein                                                 |
| Z5194 ( <i>rpmH</i> ) | -2.21 | -6.45 | -2.65 | 1.33  | 1.10  | -1.12 | -1.17 | 1.36  | LSU ribosomal protein L34P                                                                             |
| Z0821 ( <i>asnB</i> ) | -2.19 | -3.36 | -2.16 | -1.29 | -1.56 | -1.01 | 2.08  | 2.58  | asparagine synthase (glutamine-hydrolysing)                                                            |
| Z3413 ( <i>lysP</i> ) | -2.19 | -2.48 | -2.72 | -1.98 | -1.75 | -1.19 | 1.17  | 1.30  | lysine-specific permease                                                                               |
| Z1922 (Z1922)         | -2.18 | -2.34 | -2.82 | -6.17 | -9.01 | -2.87 | 2.73  | 2.84  | unknown protein encoded by prophage CP-933X                                                            |
| Z1749 ( <i>ycfJ</i> ) | -2.17 | -2.52 | -3.19 | -2.29 | -2.77 | -1.49 | -1.30 | -1.18 | hypothetical protein                                                                                   |
| Z3275 (Z3275)         | -2.17 | -2.13 | -2.12 | -1.34 | -1.27 | -2.23 | 1.34  | 1.49  | hypothetical protein                                                                                   |
| Z0932 (Z0932)         | -2.16 | -3.94 | -3.52 | -1.89 | -1.85 | -1.81 | 1.77  | 2.00  | hypothetical protein                                                                                   |
| Z5195 ( <i>mpA</i> )  | -2.14 | -5.88 | -2.74 | 1.12  | 1.19  | -1.22 | -1.14 | 1.29  | ribonuclease P protein component                                                                       |
| Z2741 ( <i>himA</i> ) | -2.12 | -4.59 | -2.00 | -1.13 | -1.32 | -1.80 | 1.27  | 1.35  | integration host factor alpha subunit                                                                  |
| Z3377 ( <i>yehW</i> ) | -2.11 | -2.16 | -2.97 | -3.88 | -3.89 | -1.60 | -2.00 | -2.14 | putative transport system permease protein uptake of enterochelin; tonB-dependent uptake of B colicins |
| Z4358 ( <i>exbD</i> ) | -2.10 | -4.81 | -3.72 | -1.67 | -1.23 | -2.12 | -1.25 | -1.04 | uptake of B colicins                                                                                   |
| Z0925 ( <i>gpmA</i> ) | -2.08 | -5.95 | -2.23 | -1.17 | -1.13 | -2.05 | 1.09  | 1.58  | phosphoglycerate mutase                                                                                |

|                       |       |       |       |       |       |       |       |       |                                                                                                                    |
|-----------------------|-------|-------|-------|-------|-------|-------|-------|-------|--------------------------------------------------------------------------------------------------------------------|
| Z2269 (Z2269)         | -2.04 | -2.27 | -2.30 | -4.57 | -3.92 | -2.29 | -1.34 | -1.28 | transcriptional regulator, GntR family                                                                             |
| Z4154 ( <i>aas</i> )  | -2.04 | -5.52 | -5.68 | -4.52 | -5.43 | -2.33 | -3.94 | -3.89 | 2-acyl-glycerophospho-ethanolamine acyltransferase                                                                 |
| Z2030 ( <i>tonB</i> ) | -2.02 | -4.24 | -2.72 | -1.85 | -1.79 | -1.83 | -1.32 | -1.36 | energy transducer; uptake of iron, cyanocobalimin; sensitivity to colicins                                         |
| Z3691 ( <i>ucpA</i> ) | 6.34  | 3.26  | 10.49 | 9.61  | 9.67  | 3.04  | 1.29  | 2.11  | short chain dehydrogenase                                                                                          |
| Z0740 ( <i>cstA</i> ) | 6.02  | 2.88  | 7.53  | 4.83  | 3.10  | 3.28  | 1.35  | 1.64  | carbon starvation protein                                                                                          |
| Z4208 ( <i>ygeV</i> ) | 5.86  | 5.37  | 11.04 | 10.70 | 10.63 | 1.78  | 2.02  | 2.53  | putative transcriptional regulator                                                                                 |
| Z4217 (Z4217)         | 5.85  | 8.19  | 15.66 | 11.59 | 10.76 | 1.15  | -1.21 | -1.83 | selenate reductase, Fe-S subunit (IMGterm)                                                                         |
| Z4214 (Z4214)         | 4.61  | 6.04  | 7.68  | 3.67  | 3.58  | 2.01  | -1.33 | -1.80 | predicted molybdenum cofactor sulfurylase (IMGterm)                                                                |
| Z4207 (Z4207)         | 4.52  | 5.23  | 6.22  | 4.35  | 3.66  | 1.28  | 1.14  | -1.32 | putative dehydrogenase                                                                                             |
| Z1190 (Z1190)         | 4.38  | 4.65  | 5.65  | 4.23  | 4.42  | 2.14  | 1.01  | 1.18  | putative glucosyltransferase                                                                                       |
| Z4216 ( <i>ygfJ</i> ) | 4.25  | 5.34  | 7.54  | 4.35  | 4.37  | 1.93  | -1.15 | -1.08 | hypothetical protein                                                                                               |
| Z4302 ( <i>ansB</i> ) | 4.11  | 2.57  | 7.11  | 5.03  | 4.93  | 2.13  | -1.11 | -1.03 | asparaginase (EC 3.5.1.1) (IMGterm)                                                                                |
| Z2565 (Z2565)         | 4.10  | 2.16  | 5.02  | 7.35  | 9.08  | 1.91  | 2.35  | 2.81  | putative chaperone protein                                                                                         |
| Z0038 ( <i>carB</i> ) | 4.05  | 3.20  | 5.79  | 11.54 | 7.07  | -1.01 | -1.31 | -1.43 | carbamoyl-phosphate synthase large subunit (IMGterm)                                                               |
| Z4351 (Z4351)         | 3.99  | 2.37  | 5.39  | 6.19  | 6.32  | 4.70  | 1.34  | 1.82  | putative hydrogenase subunit                                                                                       |
| Z4468 ( <i>tdcC</i> ) | 3.69  | 2.82  | 5.27  | 4.17  | 5.15  | 3.00  | 1.40  | 1.85  | anaerobically inducible L-threonine, L-serine permease                                                             |
| Z1629m (Z1629m)       | 3.65  | 3.54  | 4.50  | 3.27  | 3.35  | 1.86  | -1.10 | -1.08 | glycosyl transferase                                                                                               |
| Z0078 (Z0078)         | 3.64  | 3.45  | 3.63  | 2.67  | 2.56  | 2.71  | 1.75  | 1.46  | hypothetical protein                                                                                               |
| Z0742 ( <i>ybdH</i> ) | 3.63  | 3.52  | 4.26  | 2.78  | 2.32  | 2.30  | 1.40  | 1.19  | putative oxidoreductase                                                                                            |
| Z5670 ( <i>nrfB</i> ) | 3.59  | 2.90  | 4.02  | 4.34  | 5.21  | 2.93  | 1.44  | 1.68  | respiratory nitrite reductase specific menaquinol--cytochrome-c reductase complex subunit NrfB precursor (IMGterm) |
| Z0040 (Z0040)         | 3.57  | 4.48  | 6.49  | 6.42  | 6.61  | 2.02  | 1.12  | 1.04  | transcriptional regulator of cai operon                                                                            |

|                        |      |      |      |       |       |      |       |       |                                                                                                        |
|------------------------|------|------|------|-------|-------|------|-------|-------|--------------------------------------------------------------------------------------------------------|
| Z2946 ( <i>flhD</i> )  | 3.39 | 2.24 | 4.99 | 17.49 | 20.22 | 1.91 | 1.69  | 1.99  | transcriptional activator FlhD                                                                         |
| Z5504m ( <i>frwC</i> ) | 3.37 | 4.14 | 6.20 | 8.22  | 5.18  | 3.38 | 2.06  | 2.44  | PTS system IIC component (IMGterm)                                                                     |
| Z4218 (Z4218)          | 3.31 | 3.34 | 5.05 | 5.34  | 4.17  | 1.21 | -3.85 | -6.25 | proteoglycan                                                                                           |
| Z2956 ( <i>yecI</i> )  | 3.28 | 3.51 | 5.49 | 5.63  | 5.40  | 2.31 | 1.76  | 1.52  | ferritin-like protein                                                                                  |
| Z1399 ( <i>yccY</i> )  | 3.19 | 3.63 | 4.98 | 12.04 | 11.54 | 2.03 | 3.76  | 3.43  | putative phosphatase                                                                                   |
| L7049 ( <i>hlyB</i> )  | 2.98 | 4.06 | 3.69 | 5.46  | 7.17  | 2.33 | 2.64  | 2.23  | hemolysin transport protein                                                                            |
| L7031 (L7031)          | 2.97 | 2.45 | 2.60 | 2.67  | 2.56  | 1.46 | 1.16  | 1.02  | StcE -like peptidase. Metallo peptidase.<br>MEROPS family M66 (IMGterm)                                |
| Z4885 ( <i>yhiH</i> )  | 2.94 | 4.48 | 5.56 | 5.86  | 5.59  | 2.10 | 1.54  | 1.11  | putative ATP-binding component of a<br>transport system, fragment 1                                    |
| Z1931 (Z1931)          | 2.86 | 3.30 | 7.32 | 9.04  | 9.73  | 1.95 | 1.94  | 2.66  | outer membrane protein 3b (a), protease VII                                                            |
| Z4215 (Z4215)          | 2.85 | 3.68 | 5.58 | 4.47  | 3.79  | 1.61 | 1.87  | 2.23  | hypothetical protein                                                                                   |
| Z4470 ( <i>tdcA</i> )  | 2.79 | 2.74 | 3.94 | 1.51  | 1.94  | 1.97 | -1.73 | -1.41 | transcriptional activator of <i>tdc</i> operon                                                         |
| Z5910 ( <i>fimB</i> )  | 2.70 | 2.47 | 3.74 | 3.51  | 3.94  | 1.35 | 1.10  | -1.04 | recombinase involved in phase variation;<br>regulator for <i>fimA</i>                                  |
| Z3401 (Z3401)          | 2.50 | 4.08 | 5.43 | 4.42  | 5.10  | 1.94 | 2.01  | 1.23  | putative oxidoreductase                                                                                |
| Z5957 ( <i>yjjM</i> )  | 2.49 | 2.92 | 2.87 | 1.84  | 1.97  | 1.28 | 1.16  | -1.01 | transcriptional regulator, GntR family<br>(IMGterm)                                                    |
| Z3402 ( <i>yeiA</i> )  | 2.48 | 2.84 | 4.27 | 2.57  | 2.57  | 2.16 | 1.26  | 1.17  | dihydroorotate oxidase B, catalytic subunit<br>(EC 1.3.3.1) (IMGterm)                                  |
| Z2844 ( <i>yeaV</i> )  | 2.44 | 3.00 | 3.13 | 9.63  | 7.59  | 2.56 | 2.86  | 3.60  | putative transport protein                                                                             |
| Z2696 (Z2696)          | 2.39 | 2.36 | 2.57 | -1.40 | -1.64 | 1.71 | -1.51 | -1.87 | hypothetical protein                                                                                   |
| Z5953 ( <i>yjiY</i> )  | 2.26 | 2.44 | 2.97 | 2.86  | 2.33  | 1.80 | 1.01  | 1.09  | putative carbon starvation protein                                                                     |
| Z1401 ( <i>ymcA</i> )  | 2.21 | 2.51 | 2.85 | 4.31  | 4.21  | 1.92 | 1.18  | 1.21  | hypothetical protein                                                                                   |
| Z2585 ( <i>bioD</i> )  | 2.10 | 2.28 | 2.61 | 2.03  | 1.85  | 2.12 | 1.49  | 1.62  | dethiobiotin synthase (EC 6.3.3.3)<br>(IMGterm)                                                        |
| Z4036 ( <i>hypB</i> )  | 2.08 | 2.04 | 2.73 | 3.51  | 4.21  | 2.30 | 1.75  | 2.33  | guanine-nucleotide binding protein,<br>functions as nickel donor for large subunit<br>of hydrogenase 3 |

|                       |      |      |      |      |      |      |      |      |                                                                                   |
|-----------------------|------|------|------|------|------|------|------|------|-----------------------------------------------------------------------------------|
| Z2036 ( <i>intO</i> ) | 2.07 | 2.25 | 2.28 | 1.41 | 1.64 | 1.87 | 1.61 | 1.15 | putative integrase for prophage CP-933O                                           |
| Z1172 ( <i>terA</i> ) | 2.02 | 2.39 | 2.60 | 3.46 | 2.49 | 1.81 | 3.08 | 2.78 | putative phage inhibition, colicin resistance<br>and tellurite resistance protein |

---
